# Supplementary material for: Facile preparation of Ti3+ self-doped TiO2 nanoparticles and their dramatic visible photocatalytic activity for the fast treatment of highly concentrated Cr(vi) effluent
Source: Royal Society of Chemistry journal article supplement (doi:10.1039/c9cy00161a), 2019-01-01
Supplement: c9cy00161a1.pdf [file c9cy00161a1.pdf]

## Supplementary Data

# **Facile preparation of Ti<sup>3+</sup> self-doped TiO<sub>2</sub> nanoparticles and their dramatic visible photocatalytic activity for fast restoration of highly concentrated Cr(VI) effluent**

Weiming Hao, Xiangqing Li, Lixia Qin, Sheng Han\*, Shi-Zhao Kang\*

*School of Chemical and Environmental Engineering, Shanghai Institute of Technology, 100 Haiquan Road, Shanghai 201418, China*

\* Corresponding author: Shi-Zhao Kang, Tel./fax: +86 21 60873061.

*E-mail address:* kangsz@sit.edu.cn (S.-Z. Kang)

Supplementary Fig. S1

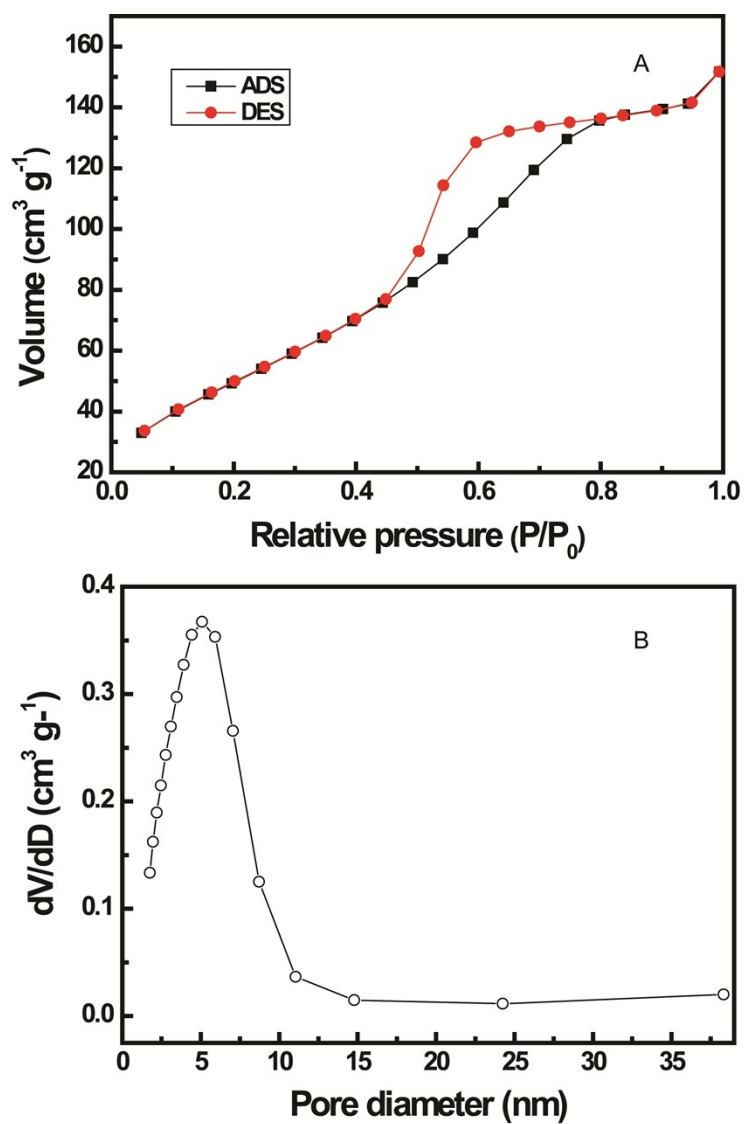

**Fig. S1.** (A) Nitrogen adsorption-desorption isotherm and (B) pore size distribution curve of TiO<sub>2</sub>/Ti (III).

Supplementary Fig. S2

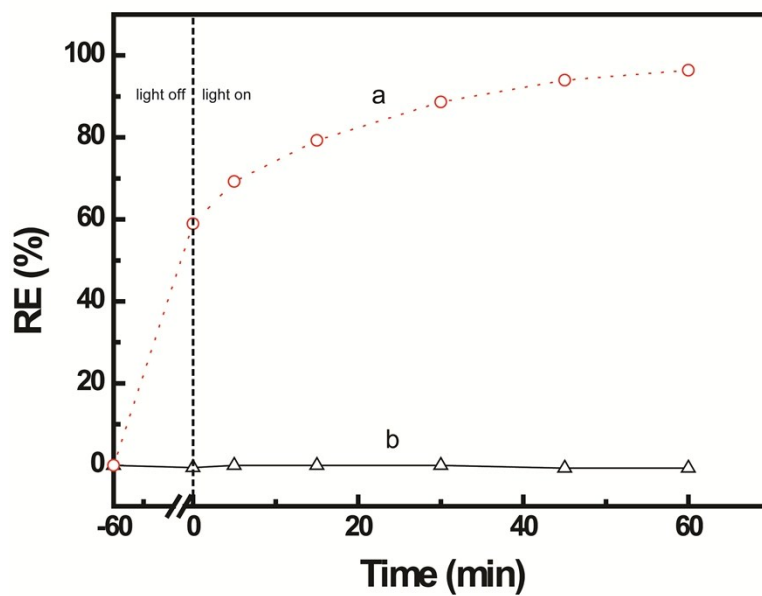

**Fig. S2.** Time-courses of photocatalytic degradation of methyl orange in the (a) presence and (b) absence of  $\text{TiO}_2/\text{Ti (III)}$  under visible irradiation.

Supplementary Fig. S3

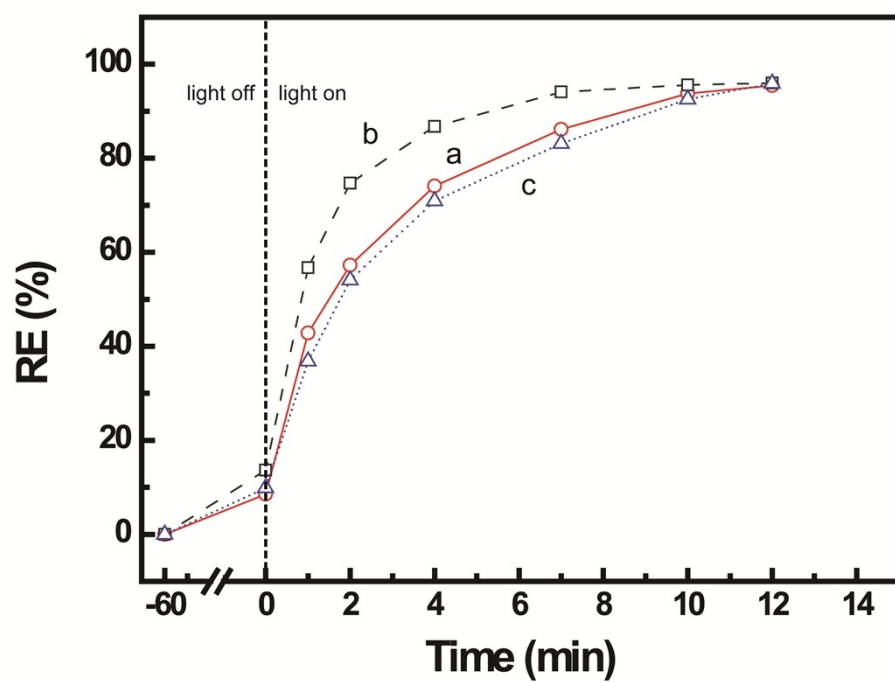

**Fig. S3.** Time-courses of photocatalytic reduction of Cr (VI) over (a)  $\text{TiO}_2/\text{Ti}$  (III), (b)  $\text{TiO}_2$  nanoparticles prepared using NaOH as pH modifier and (c)  $\text{TiO}_2$  nanoparticles prepared in the absence of  $\text{NH}_3$ .

Supplementary Fig. S4

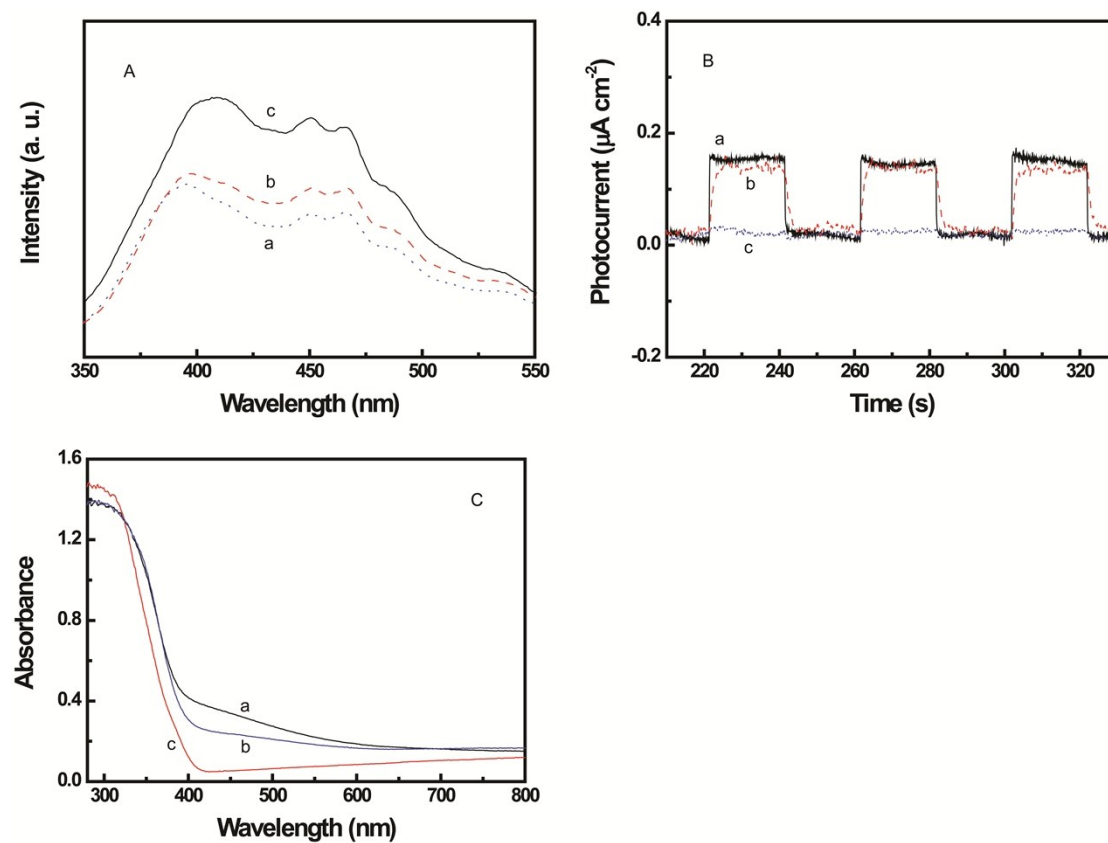

**Fig. S4.** (A) Photoluminescence spectra of (a) TiO<sub>2</sub>/Ti (III), (b) TiO<sub>2</sub> nanoparticles prepared in the absence of NH<sub>3</sub> and (c) P25 excited at 280 nm; (B) transient photocurrent-time curves of (a) TiO<sub>2</sub>/Ti (III), (b) TiO<sub>2</sub> nanoparticles prepared in the absence of NH<sub>3</sub> and (c) P25; (C) UV-vis spectra of (a) TiO<sub>2</sub>/Ti (III), (b) TiO<sub>2</sub> nanoparticles prepared in the absence of NH<sub>3</sub> and (c) P25.

Supplementary Fig. S5

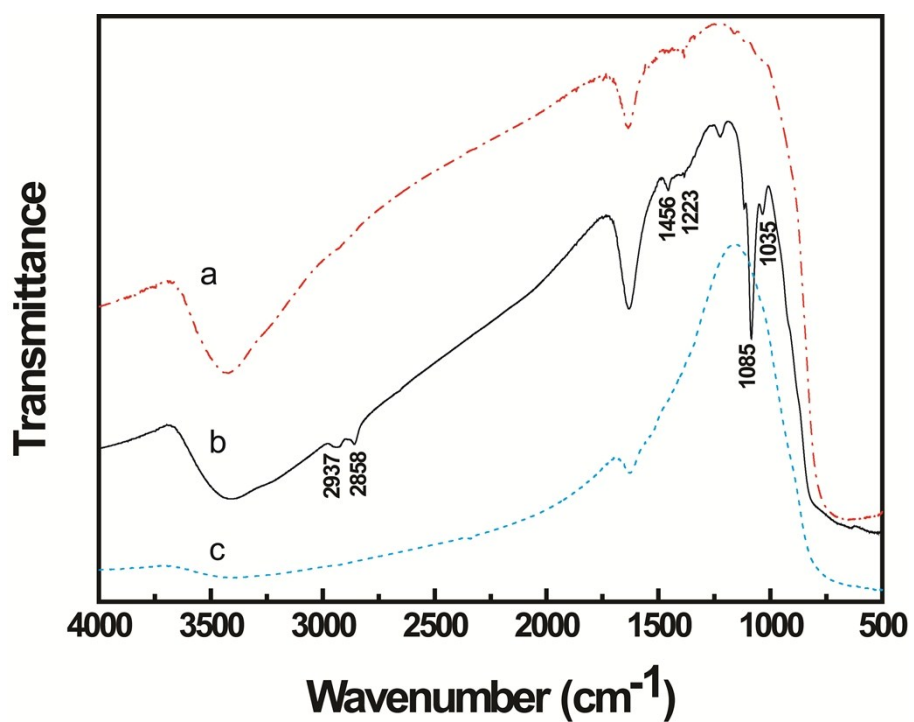

**Fig. S5.** FT-IR spectra of (a) P25, (b) TiO<sub>2</sub>/Ti (III) and (c) TiO<sub>2</sub>/Ti (III) after calcined at 400°C for 2 h.

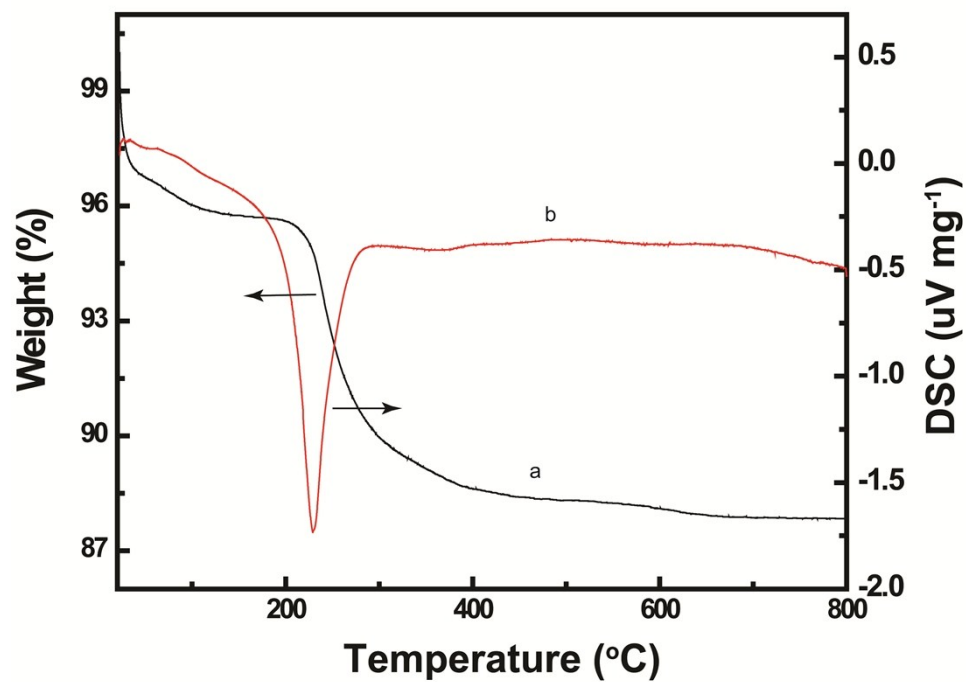

Fig. S6. TGA curve (a) and DSC curve (b) of TiO<sub>2</sub>/Ti (III).

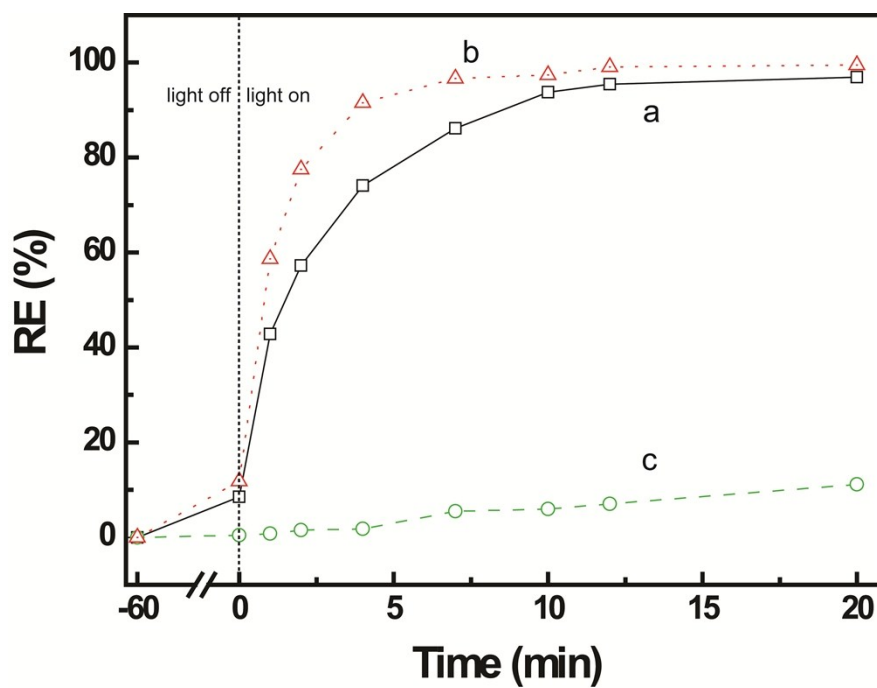

**Fig. S7.** Time-courses of photocatalytic reduction of Cr (VI) in the presence of (a) TiO<sub>2</sub>/Ti (III), (b) TiO<sub>2</sub>/Ti (III) and ethylene glycol ( $1.8 \times 10^{-2}$  mol L<sup>-1</sup>) and (c) ethylene glycol ( $1.8 \times 10^{-2}$  mol L<sup>-1</sup>).



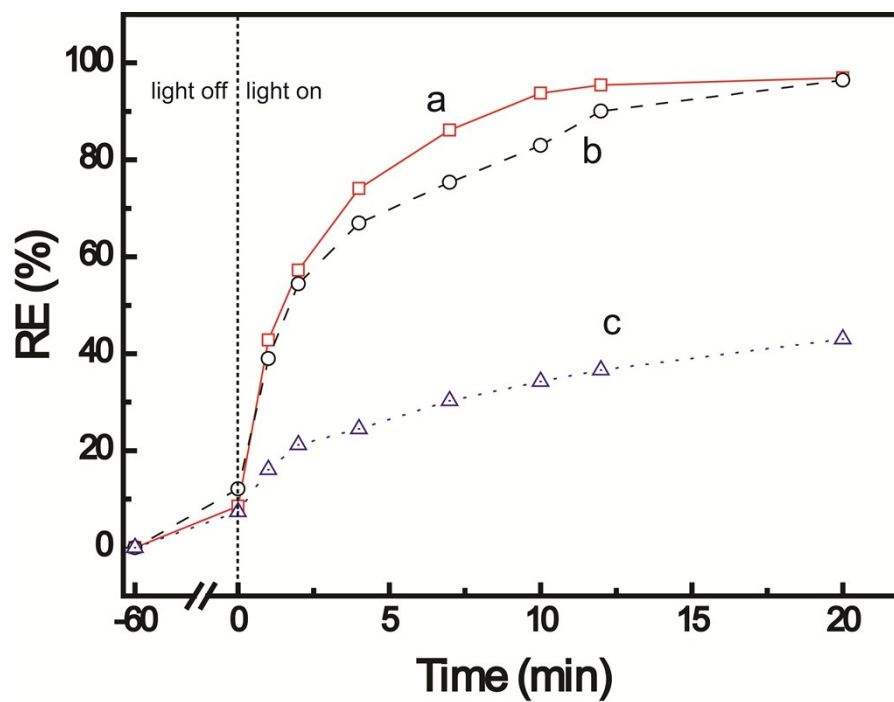

**Fig. S8.** Time-courses of photocatalytic reduction of Cr (VI) over (a) the fresh  $\text{TiO}_2/\text{Ti (III)}$ , (b) the used  $\text{TiO}_2/\text{Ti (III)}$  after regenerated in the same solvothermal process and (c) the used  $\text{TiO}_2/\text{Ti (III)}$ .

Supplementary Fig. S9

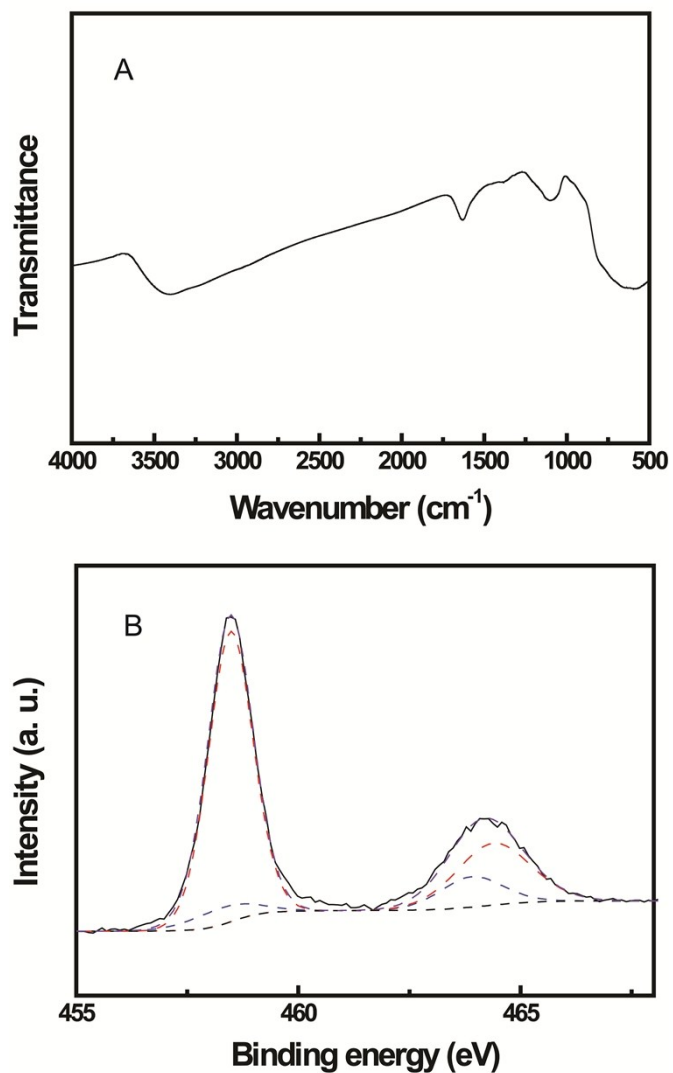

**Fig. S9.** (A) FT-IR spectrum, and (B) XPS spectrum of Ti 2p and curve-fitting analysis (dot lines) of states of Ti of the used TiO<sub>2</sub>/Ti (III) after the fifth cycle.
